# Supplementary material for: Exploration of Solanum xanthocarpum Schrad. & Wendl. against Mycobacterium avium Subspecies paratuberculosis and Assessment of Its Immunomodulatory and Anti-Inflammatory Potential
Source: MDPI journal article supplement (doi:10.3390/ph15111367), 2022-11-08
Supplement: s1 [file s1]

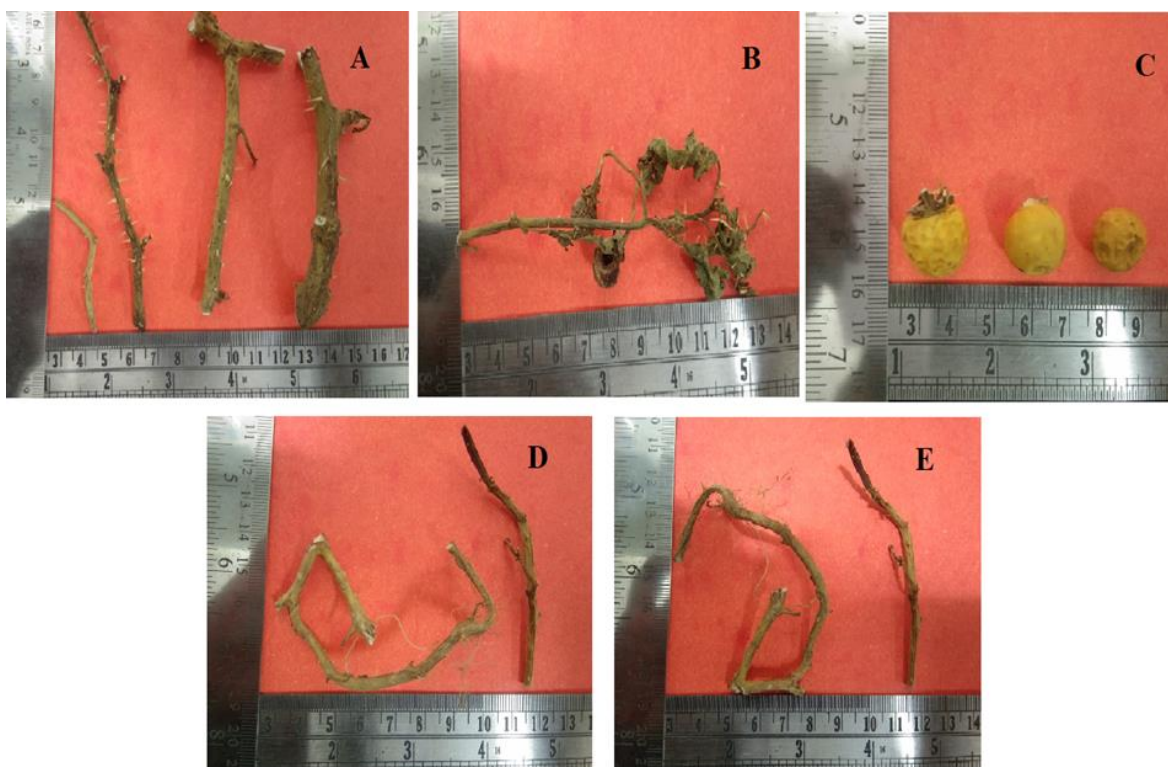

Figure S1. Macroscopic evaluation of whole plant of *Solanum xanthocarpum* Schrad. &Wendl; (A) stem, (B) whole plant (leaf, stem and fruit), (C) fruit. (D, E) root.
